# Supplementary material for: Transcriptomic analysis of 3D vasculature-on-a-chip reveals paracrine factors affecting vasculature growth and maturation
Source: Royal Society of Chemistry journal article supplement (doi:10.1039/d2lc00570k), 2022-01-01

A

Size distribution of cDNA from 3D cultures retrieved  
using Trypsin

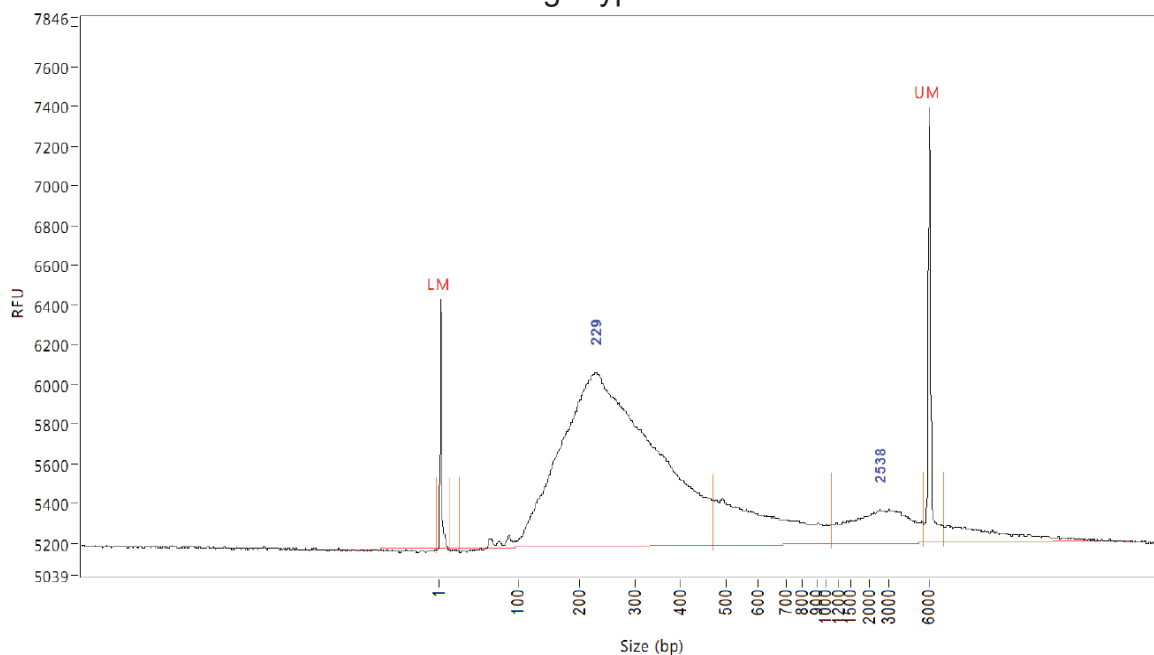

Size distribution of cDNA from 3D cultures retrieved  
using Accutase

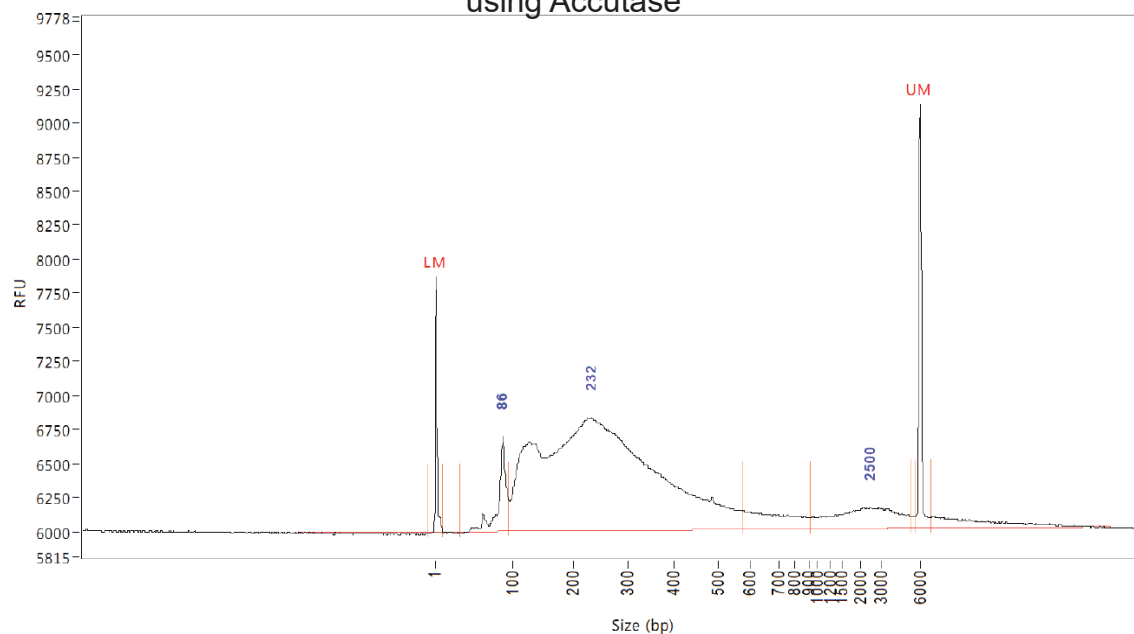

Size distribution of cDNA from 3D cultures retrieved  
using our developed approach

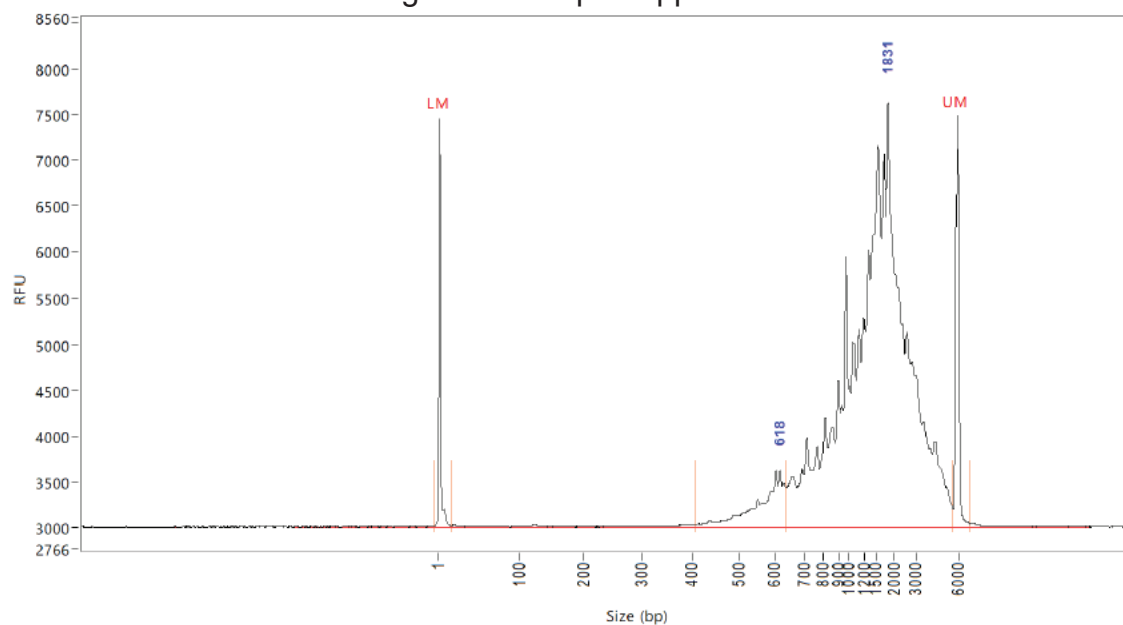

B

### Top genes driving the variation along PC1

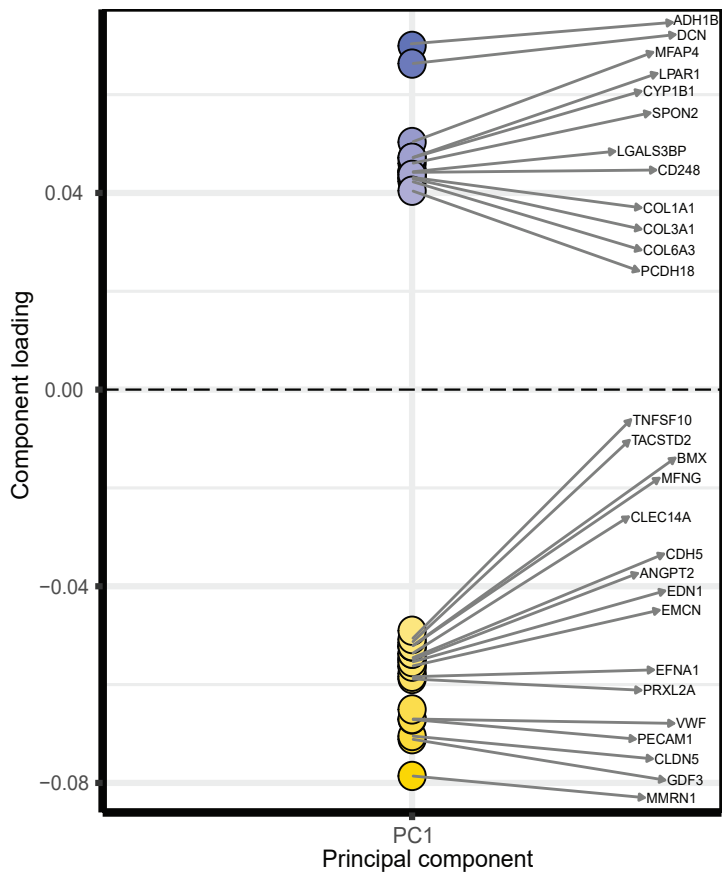

C

### GO: Biological Process

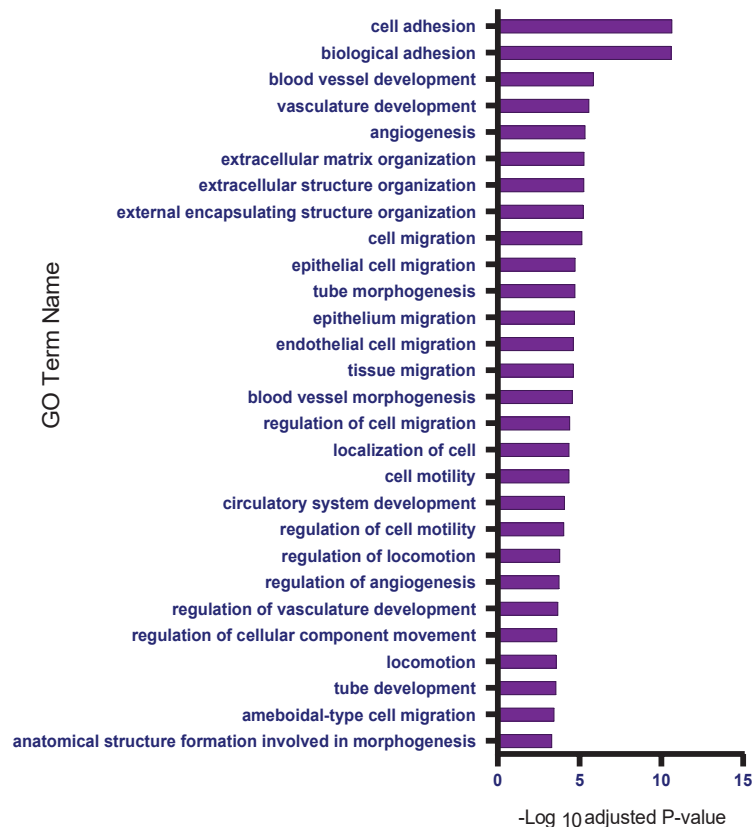

Supplement: d2lc00570k4.pdf [file d2lc00570k4.pdf]
