# Supplementary figures and images for: Transcriptomic analysis of 3D vasculature-on-a-chip reveals paracrine factors affecting vasculature growth and maturation
Source: Royal Society of Chemistry journal article supplement (doi:10.1039/d2lc00570k), 2022-01-01

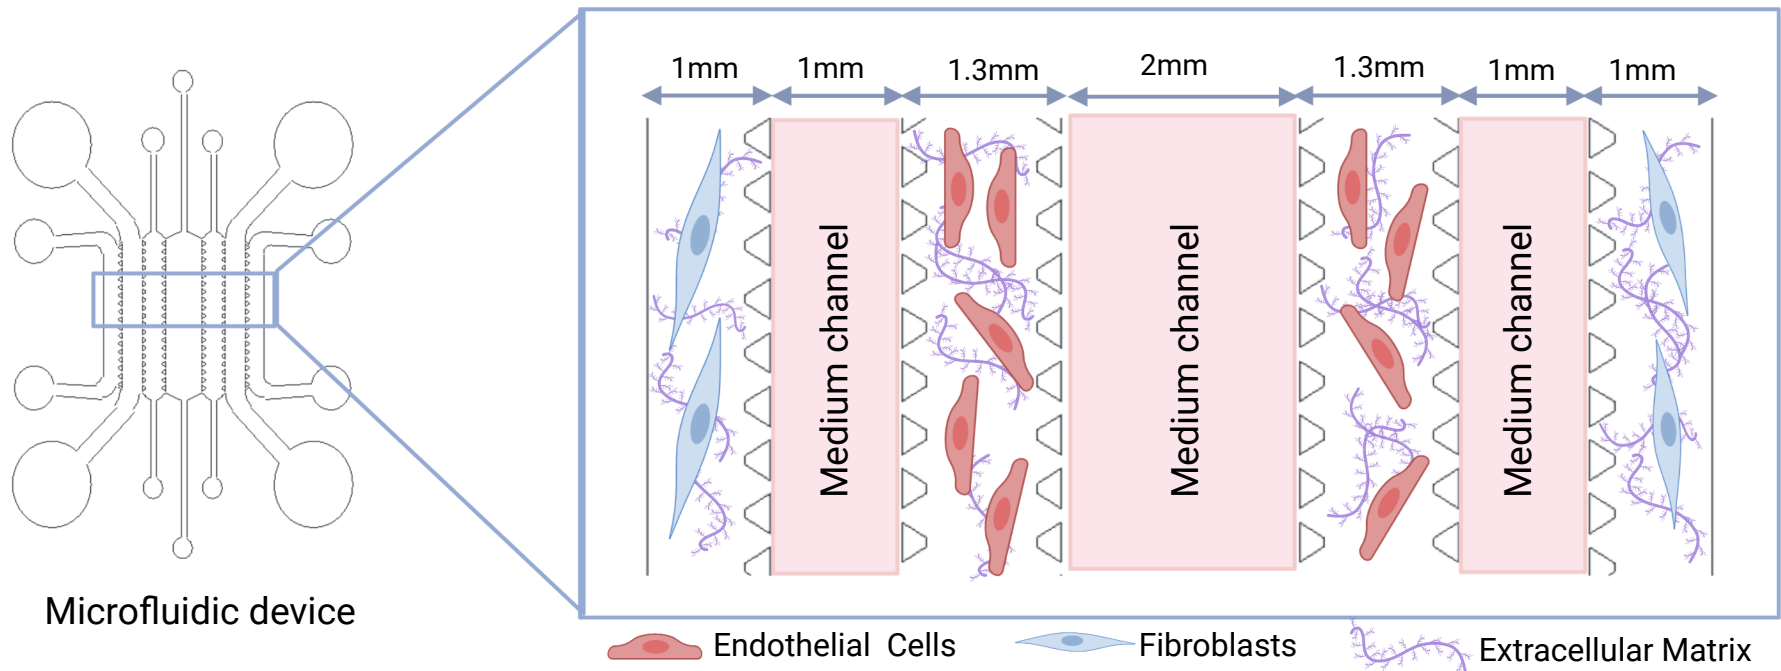

Supplement: d2lc00570k2.pdf [file d2lc00570k2.pdf]

A

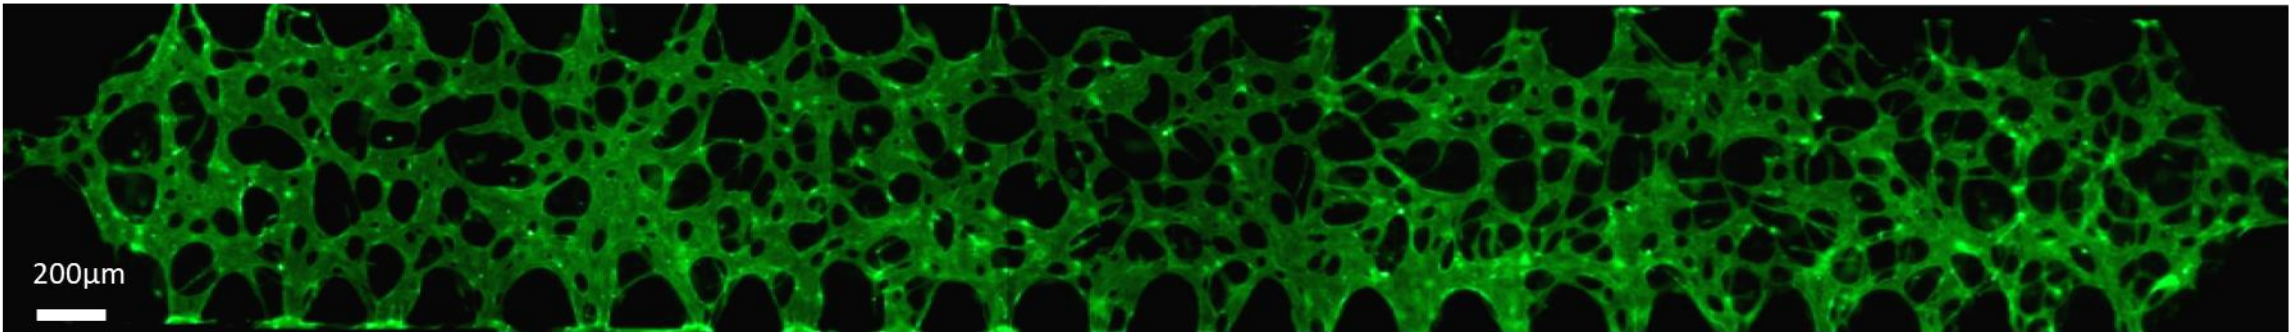

B

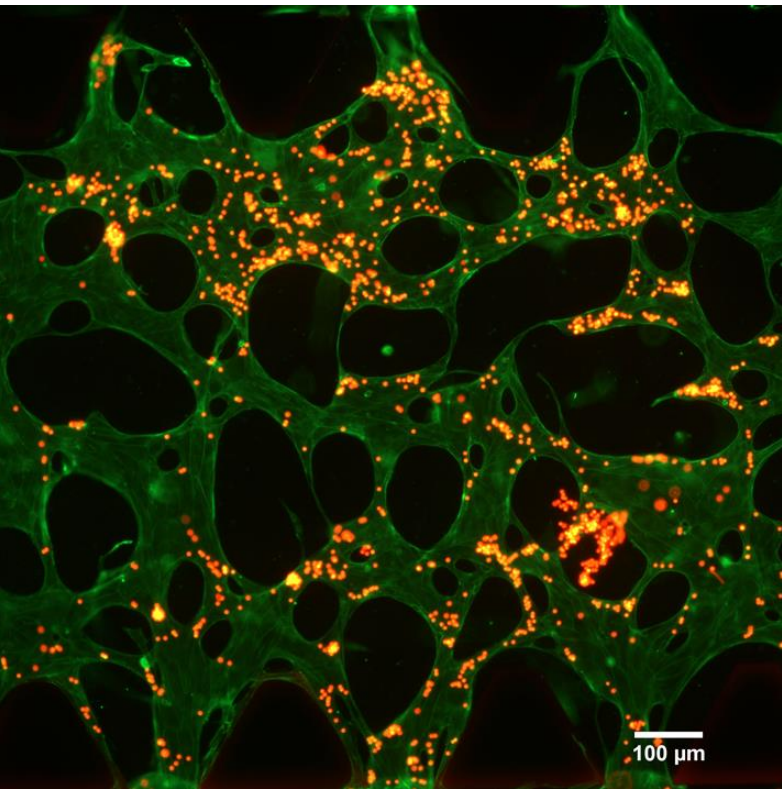

C

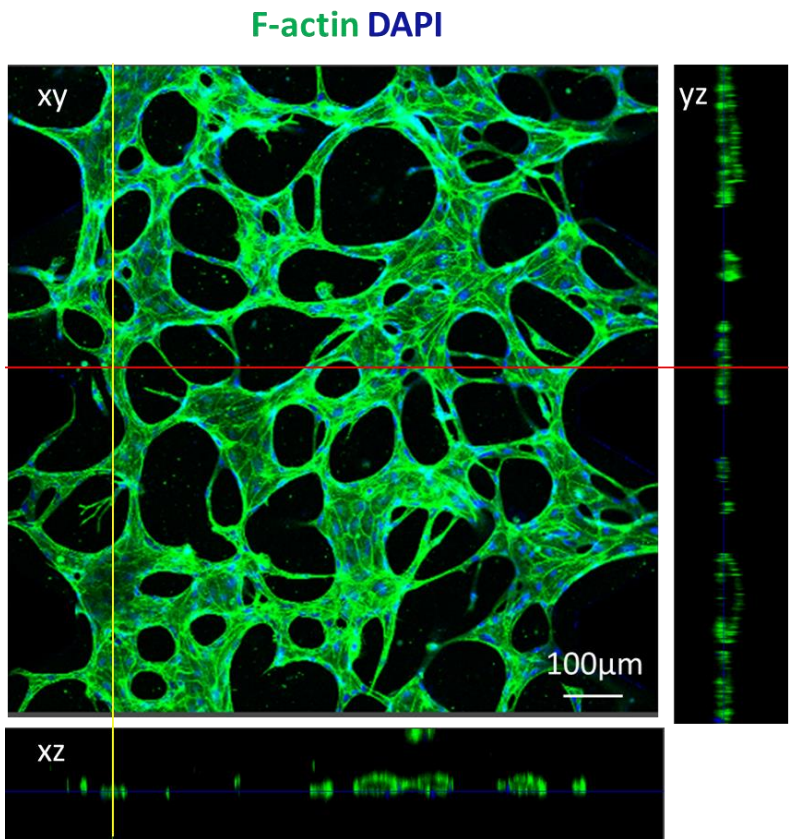

D

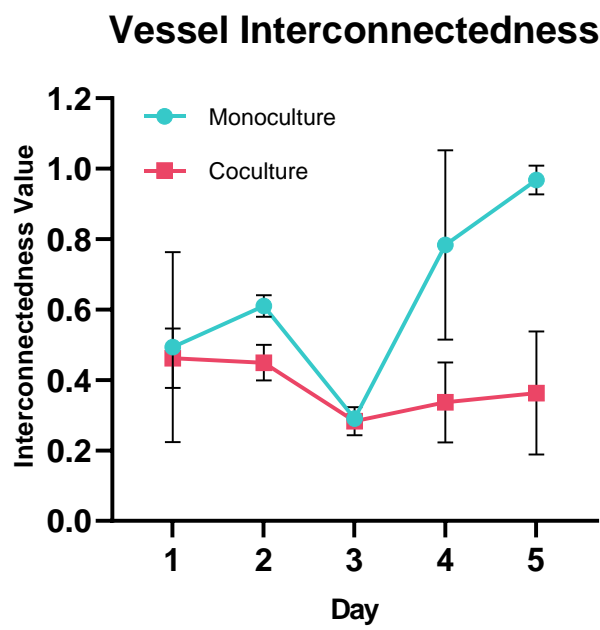

Supplement: d2lc00570k3.pdf [file d2lc00570k3.pdf]

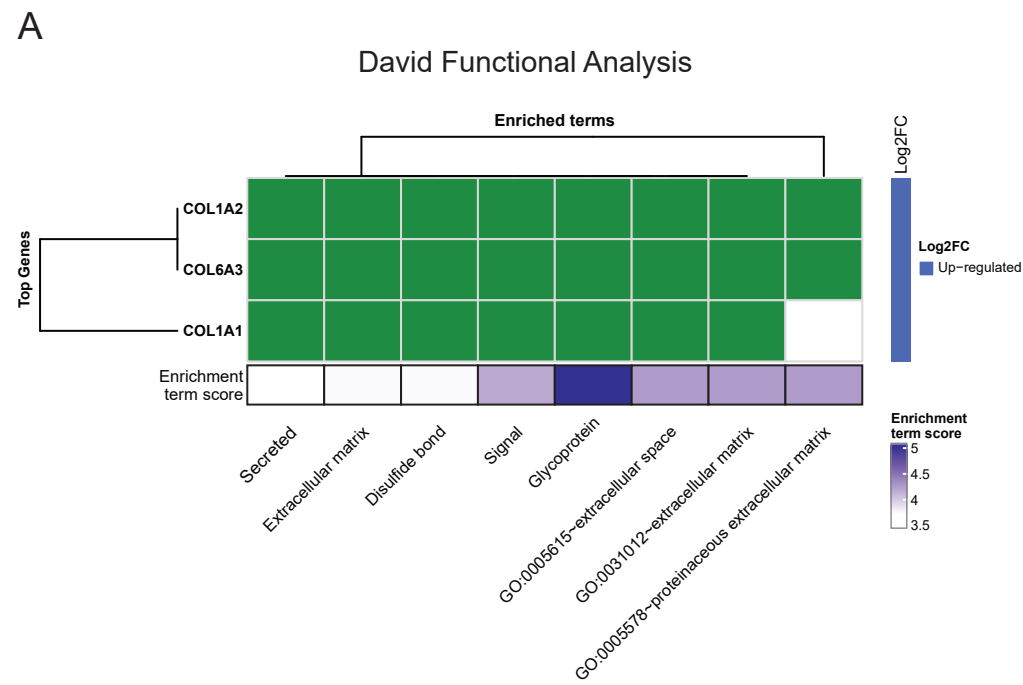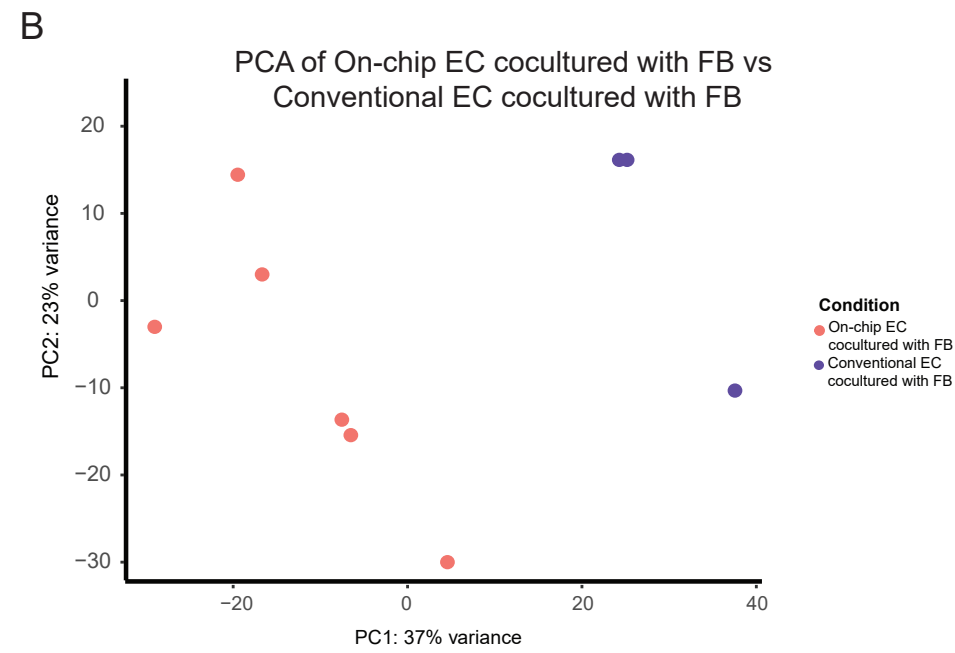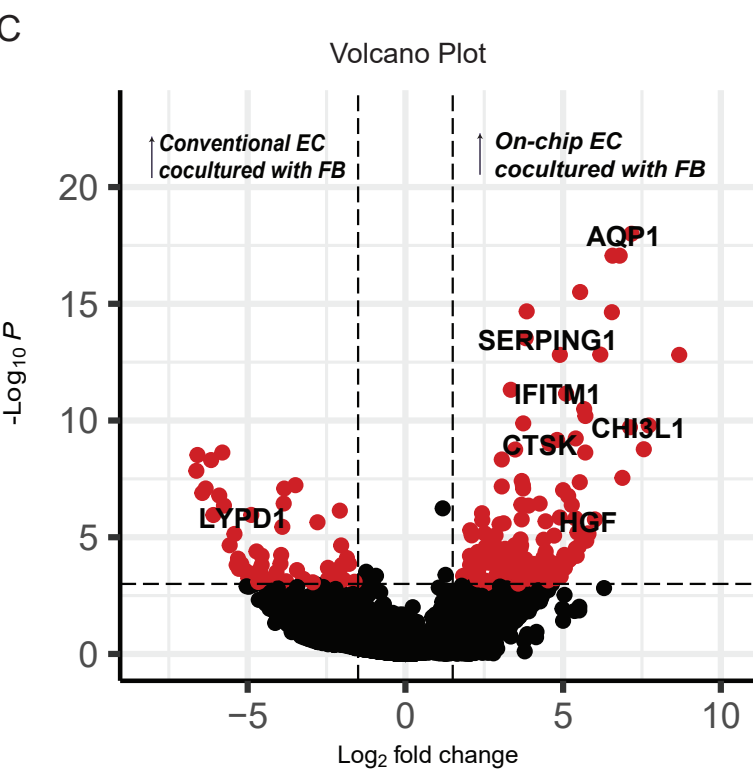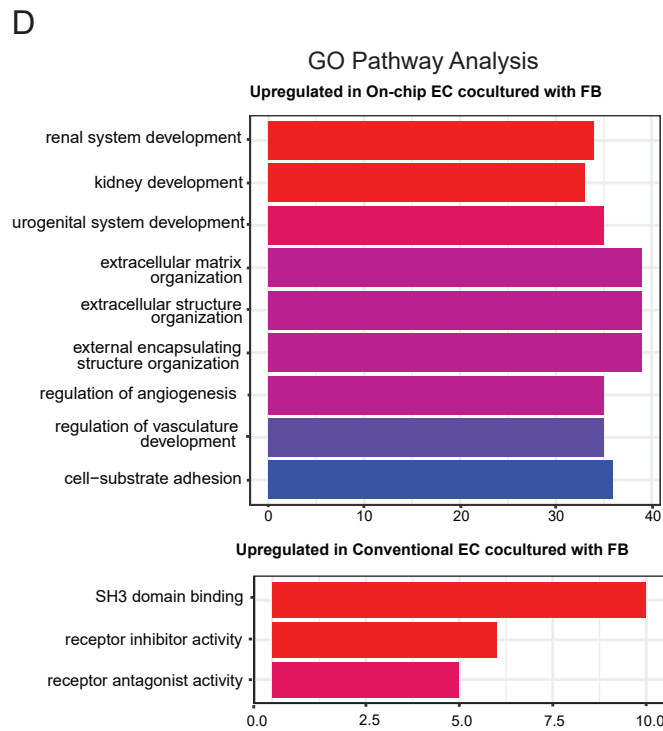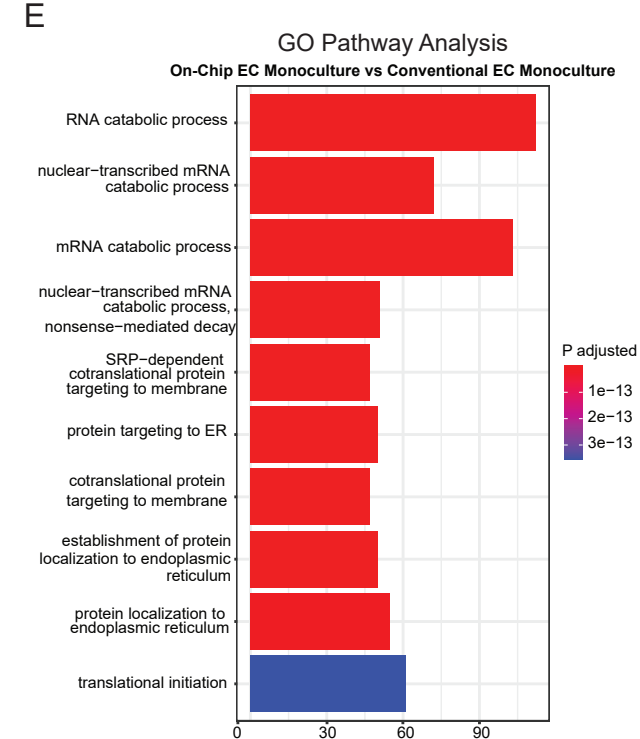

Supplement: d2lc00570k6.pdf [file d2lc00570k6.pdf]

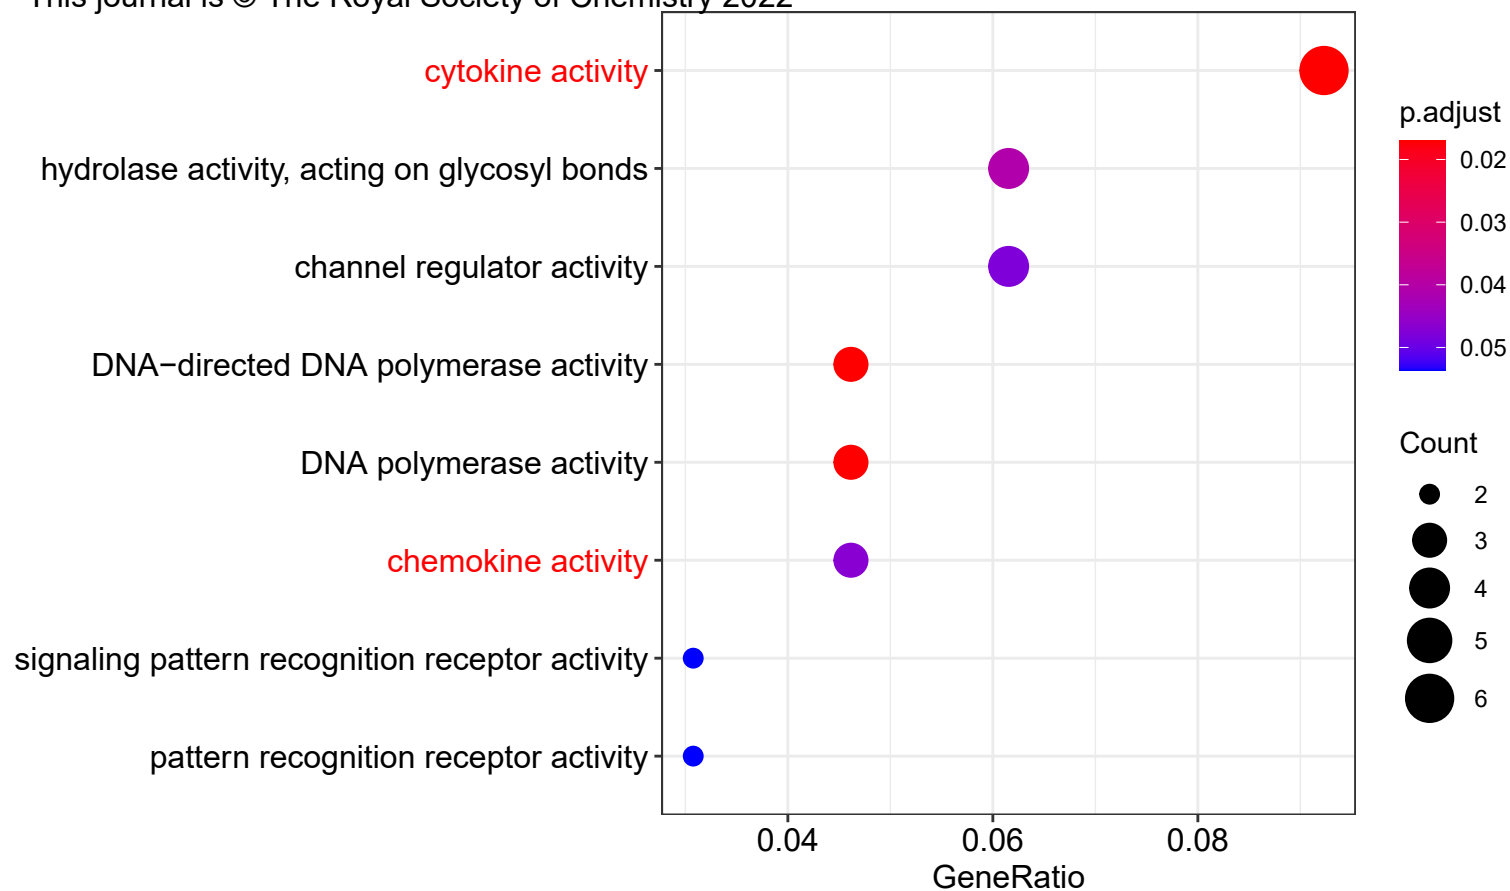

Supplement: d2lc00570k9.pdf [file d2lc00570k9.pdf]
